# Supplementary material for: The evolutionary plasticity of chromosome metabolism allows adaptation to constitutive DNA replication stress
Source: eLife. 2020 Feb 11;9:e51963. doi: 10.7554/eLife.51963 (PMC7069727; doi:10.7554/eLife.51963)
Supplement: Figure 1—figure supplement 1—source data 1. [file elife-51963-fig1-figsupp1-data1.xlsx]

## Sheet: Sheet1
strain	1	2	3	4	5	6
EVO1	-0.11163	-0.11229	-0.109021
EVO2	-0.0975483	-0.0940928	-0.0985533
EVO3	-0.0818375	-0.0785244	-0.0748376
EVO4	-0.0986962	-0.104367	-0.110286
EVO5	-0.0935136	-0.0934705	-0.0942363
EVO6	-0.092498	-0.0940941	-0.100496
EVO7	-0.0902472	-0.0900026	-0.0877758
EVO8	-0.0748662	-0.077253	-0.075056
EVO25	0.0229731	0.0300377	0.0289664
EVO26	0.0319464	0.0359671	0.0367573
EVO27	0.0671723	0.065377	0.0634935
EVO28	0.0270014	0.0235162	0.0269312
EVO29	0.0343444	0.0305843	0.0448688
EVO30	0.0351485	0.0395499	0.0376252
EVO31	0.0625419	0.0597578	0.0582102
EVO32	0.0383627	0.0431382	0.0395439
ctf4D, MATa	-0.272202	-0.278372	-0.272604	-0.267108	-0.278157	-0.270663
ctf4D, MATa	-0.25456	-0.269499	-0.246047	-0.25461	-0.272315	-0.243348
WT MATa	0.000237	0.00184	0.000136	5e-05
WT MATa	0.000175	-0.000152	-4.5e-05
