# Supplementary material for: The evolutionary plasticity of chromosome metabolism allows adaptation to constitutive DNA replication stress
Source: eLife. 2020 Feb 11;9:e51963. doi: 10.7554/eLife.51963 (PMC7069727; doi:10.7554/eLife.51963)
Supplement: Figure 1—source data 1. [file elife-51963-fig1-data1.xlsx]

## Sheet: Sheet1
strain	1	2	3	4	5	6
EVO1_3_	-0.10912	-0.12537	-0.108451	-0.103627
EVO1_7_	-0.0984785	-0.125741	-0.109762	-0.0955247
EVO1_9_	-0.129872	-0.149266	-0.11813	-0.0990796
EVO1_12_	-0.0930805	-0.105872	-0.0954192	-0.0930386
EVO2_1_	-0.111001	-0.116246	-0.101398	-0.106496
EVO2_2_	-0.102597	-0.133198	-0.0988858	-0.119488
EVO2_3_	-0.102923	-0.125134	-0.138863	-0.151136
EVO2_10_	-0.112451	-0.1009	-0.128198	-0.121087
EVO3_1_	-0.0721747	-0.104515	-0.127962	-0.113537
EVO3_8_	-0.111695	-0.142815	-0.136729	-0.133016
EVO3_9_	-0.074008	-0.10583	-0.0993192	-0.0927551
EVO3_12_	-0.10475	-0.133005	-0.113019	-0.110852
EVO4_2_	-0.116363	-0.102457	-0.0934499	-0.100398
EVO4_3_	-0.104382	-0.10489	-0.0969293	0.00195353
EVO4_5_	-0.11722	-0.0899998	-0.0922357	-0.0833594
EVO4_9_	-0.108254	-0.079198	-0.0733534	-0.0729895
EVO5_3_	-0.114681	-0.0675448	-0.0620147	-0.0833029
EVO5_4_	-0.116901	-0.0822138	-0.0846395	-0.0748112
EVO5_5_	-0.154399	-0.117557	-0.118778	-0.101847
EVO5_11_	-0.117613	-0.090326	-0.0972274	-0.0779449
EVO6_1_	-0.135438	-0.137522	-0.120205	-0.109182
EVO6_3_	-0.112285	-0.101151	-0.106861	-0.09072
EVO6_5_	-0.124884	-0.128996	-0.12026	-0.106387
EVO6_7_	-0.135818	-0.119167	-0.110961	-0.110177
EVO7_4_	-0.112449	-0.0730342	-0.0620073	-0.0731931
EVO7_6_	-0.107808	-0.0898774	-0.07546	-0.0689068
EVO7_7_	-0.147471	-0.104201	-0.10607	-0.121124
EVO7_9_	-0.109247	-0.092148	-0.0704638	-0.0778872
EVO8_5_	-0.0983199	-0.0520281	-0.054381	-0.0692725
EVO8_7_	-0.0738978	-0.0527505	-0.0536954	-0.0569804
EVO8_9_	-0.0837826	-0.051042	-0.0598464	-0.0570746
EVO8_10_	-0.200813	-0.120312	-0.0951386	-0.128344
ctf4D, MATa	-0.272202	-0.278372	-0.272604	-0.267108	-0.278157	-0.270663
ctf4D, MATa	-0.25456	-0.269499	-0.246047	-0.25461	-0.272315	-0.243348
