# Supplementary material for: The evolutionary plasticity of chromosome metabolism allows adaptation to constitutive DNA replication stress
Source: eLife. 2020 Feb 11;9:e51963. doi: 10.7554/eLife.51963 (PMC7069727; doi:10.7554/eLife.51963)
Supplement: Figure 2—source data 1. [file elife-51963-fig2-data1.xlsx]

## Sheet: Sheet1
strain	1	2	3	4	5	6
ctf4D	0.00637442	0.00996928	0.00634691	-0.00657618	0.00190918	-0.00964377
ctf4D rad9D	0.064825	0.0672656	0.0751055	0.0869547	0.084352	0.0818382
ctf4D rad9-N876K	0.0670643	0.0734401	0.0734781
ctf4D pds1-m9	0.0288515	0.0260386	0.0265204
ctf4D dbf4-19A sld3-3A	-0.147057	-0.14215	-0.150685
ctf4D mad2D	-0.106918	-0.0946	-0.105017
