# Supplementary material for: The evolutionary plasticity of chromosome metabolism allows adaptation to constitutive DNA replication stress
Source: eLife. 2020 Feb 11;9:e51963. doi: 10.7554/eLife.51963 (PMC7069727; doi:10.7554/eLife.51963)
Supplement: Figure 3—source data 1. [file elife-51963-fig3-data1.xlsx]

## Sheet: Sheet1
strain	1	2	3	4	5	6	7	8	9
ctf4D	-0.0069878	-0.00709483	-0.00487868	0.00637442	0.00996928	0.00634691	-0.00657618	0.00190918	-0.00964377
ctf4D + pRS406	-0.012858	-0.0211296	0.00662939
ctf4D + pRS406 SCC4	0.00221445	0.016757	0.00297886	0.00790439	0.010904	0.0119014
ctf4D + pRS406 SCC2	0.0344706	0.0331373	0.0359269	0.0289142	0.0198402
ctf4D + pRS406 SCC2 + pRS404 SCC4	0.0488278	0.0417713	0.0401151
