# Supplementary material for: The evolutionary plasticity of chromosome metabolism allows adaptation to constitutive DNA replication stress
Source: eLife. 2020 Feb 11;9:e51963. doi: 10.7554/eLife.51963 (PMC7069727; doi:10.7554/eLife.51963)
Supplement: Figure 3—source data 2. [file elife-51963-fig3-data2.xlsx]

## Sheet: Sheet1
strain	1	2	3	4	5
WT	5.13699	3.58744	8.83534
ctf4D	35.4467	34.6341	40.566	47.5728	51.8519
ctf4D + pRS406	41.2903	34.0102	37.9433
ctf4D + pRS406 SCC4	36.1702	31.3364	31.1881
ctf4D + pRS406 SCC2	27.5542	30.622	25.6158
ctf4D + pRS406 SCC2 + pRS404 SCC4	27.1845	22.8814	25.3731
