# Supplementary material for: The evolutionary plasticity of chromosome metabolism allows adaptation to constitutive DNA replication stress
Source: eLife. 2020 Feb 11;9:e51963. doi: 10.7554/eLife.51963 (PMC7069727; doi:10.7554/eLife.51963)
Supplement: Figure 4—figure supplement 4—source data 1. [file elife-51963-fig4-figsupp4-data1.xlsx]

## Sheet: fitness
strain	1	2	3	4	5	6	7	8	9
ctf4D	0.00637442	0.00996928	0.00634691	-0.00657618	0.00190918	-0.00964377
ctf4D sld5-E130K	0.0950873	0.0891342	0.0872275	0.0748103	0.078555	0.0940333	0.0716383	0.0694946	0.0746392
WT	0.000237	0.00184	0.000136	5e-05
sld5-E130K	-0.029965	-0.0297739	-0.0280731
