# Supplementary material for: The evolutionary plasticity of chromosome metabolism allows adaptation to constitutive DNA replication stress
Source: eLife. 2020 Feb 11;9:e51963. doi: 10.7554/eLife.51963 (PMC7069727; doi:10.7554/eLife.51963)
Supplement: Figure 4—figure supplement 4—source data 2. [file elife-51963-fig4-figsupp4-data2.xlsx]

## Sheet: Sheet1
strain	1	2	3
ctf4D prGAL1-SML1 (glu)	-0.0214166	-0.0177248	-0.020868
ctf4D prGAL1-SML1 (gal)	0.0437481	0.00981513	0.00377416
