# Supplementary material for: The evolutionary plasticity of chromosome metabolism allows adaptation to constitutive DNA replication stress
Source: eLife. 2020 Feb 11;9:e51963. doi: 10.7554/eLife.51963 (PMC7069727; doi:10.7554/eLife.51963)
Supplement: Figure 4—source data 1. [file elife-51963-fig4-data1.xlsx]

## Sheet: Sheet1
strain	1	2	3	4	5	6	7	8	9
ctf4D	0.00637442	0.00996928	0.00634691	-0.00657618	0.00190918	-0.00964377
ctf4D sld5E130K	0.0950873	0.0891342	0.0872275	0.0748103	0.078555	0.0940333	0.0716383	0.0694946	0.0746392
ctf4D ixr1D	0.0822928	0.0836417	0.0768161	0.107452	0.0982052	0.0975403	0.108083	0.0996337	0.101845
ctf4D ixr1-Q332*	0.0767393	0.077914	0.0793746
