# Supplementary material for: The evolutionary plasticity of chromosome metabolism allows adaptation to constitutive DNA replication stress
Source: eLife. 2020 Feb 11;9:e51963. doi: 10.7554/eLife.51963 (PMC7069727; doi:10.7554/eLife.51963)
Supplement: Figure 5—figure supplement 1—source data 1. [file elife-51963-fig5-figsupp1-data1.xlsx]

## Sheet: Sheet1
population	mut. Segregation %	mut. Replication %	mut. Checkpoint %
EVO1	100	93	44
EVO2	100	100	100
EVO3	100	100	97
EVO4	21	100	83
EVO5	100	99	84
EVO6	21	100	94
EVO7	0	100	100
EVO8	100	100	25
