# Supplementary material for: The evolutionary plasticity of chromosome metabolism allows adaptation to constitutive DNA replication stress
Source: eLife. 2020 Feb 11;9:e51963. doi: 10.7554/eLife.51963 (PMC7069727; doi:10.7554/eLife.51963)
Supplement: Figure 5—source data 1. [file elife-51963-fig5-data1.xlsx]

## Sheet: Sheet1
strain	relative fitness	std	expected fitness	difference
ctf4D	0	0	0	0
ctf4D pRS406-SCC2	3.59871	0.55824	3.59871	0
ctf4D sld5-E130K	7.73748	0.819554	7.73748	0
ctf4D rad9D	8.93418	0.459886	8.93418	0
ctf4D ixr1D	11.145	0.402771	11.145	0
ctf4D rad9D sld5-E130K	11.6457	0.644981	16.6717	-5.02594
ctf4D ixr1D sld5-E130K	11.4186	0.354634	18.8825	-7.46393
ctf4D pRS406-SCC2 sld5E130K	11.9915	0.347134	11.3362	0.655324
ctf4D ixr1D pRS406-SCC2	12.1383	0.606923	14.7437	-2.60543
ctf4D rad9D pRS406-SCC2	15.7356	1.83918	12.5329	3.20274
ctf4D rad9D ixr1D	11.145	0.402771	20.0792	-8.93418
ctf4D rad9D pRS406-SCC2 sld5-E130K	21.3619	0.986168	20.2704	1.09148
ctf4D rad9D ixr1D pRS406-SCC2	28.2645	0.568558	23.6779	4.5866
ctf4D rad9D ixr1D sld5-E130K	11.4186	0.354634	27.8167	-16.3981
ctf4D ixr1D pRS406-SCC2 sld5-E130K	14.156	3.75185	22.4812	-8.32523
ctf4D ixr1D rad9D pRS406-SCC2 sld5-E130K	17.3814	2.49833	31.4154	-14.034
