# Supplementary material for: The evolutionary plasticity of chromosome metabolism allows adaptation to constitutive DNA replication stress
Source: eLife. 2020 Feb 11;9:e51963. doi: 10.7554/eLife.51963 (PMC7069727; doi:10.7554/eLife.51963)
Supplement: Figure 5—source data 2. [file elife-51963-fig5-data2.xlsx]

## Sheet: Sheet1
generations	rad9	rad9 std	sld5	sld5 std	ixr1	ixr1 std	2xSCC2	2xSCC2 std	finess	fitness std
0	0	0	0	0	0	0	0	0	-27	0
50	0	0	0	0.110619	0	0.629921	0	9.5	-25.3255	0.479525
100	0	0	0	0.38882	0	0.451281	11	10	-25.5187	2.00349
150	0	1.41066	0	1.20968	0	0.070593	34	14.5	-21.3877	0.854414
200	0	0	0	2.01307	0	0.225564	26	10.5	-20.2818	0.319211
250	0	1.35135	0	2.1645	0	0.0889228	28	10	-19.581	0.293395
300	0	0.210084	22.0866	0.860222	16.8055	2.05675	67	14.5	-16.3378	0.631897
350	0	0	28.7871	2.44779	57.7775	3.93135	100	16.5	-13.662	0.202958
400	0	0	21.6728	2.55519	70.7913	2.46456	100	17.5	-12.2439	0.447136
450	0	0	19.075	2.19193	75.2029	2.80293	100	16.5	-12.9971	0.57156
500	0	0	18.4694	2.6361	77.1661	2.06238	100	16.5	-13.3658	1.07237
550	3.24074	3.24074	12.4616	0.132846	85.1926	0.0532914	100	12.5	-12.7159	1.07112
600	12.8403	6.36258	11.9417	1.29357	88.5812	0.406911	100	14	-9.92799	0.468825
650	24.4935	6.06209	7.99631	0.562253	91.5702	0.168928	100	15	-10.0023	0.720371
700	34.5208	1.72513	7.3445	0.775158	94.0336	0.680091	100	14	-10.3573	0.49046
750	29.0293	0.457875	7.51049	1.16531	93.2663	0.742926	99	14.5	-8.92438	0.994726
800	33.5319	2.49746	5.74301	1.23373	93.8254	1.19721	100	16	-8.47586	0.20807
850	40.9296	1.58535	13.4035	1.20838	86.9594	0.194722	86	12.5	-9.45871	0.646343
900	67.8337	2.37911	10.5842	0.316308	89.4117	0.618554	100	12.5	-9.75997	0.670441
950	80.5638	3.22002	7.10469	0.408262	91.4934	0.882006	100	11.5	-6.43861	1.114
1000	84.9233	1.68635	10.2879	0.0656566	89.187	0.581934	85	11	-7.26245	0.784914
