# Supplementary material for: The evolutionary plasticity of chromosome metabolism allows adaptation to constitutive DNA replication stress
Source: eLife. 2020 Feb 11;9:e51963. doi: 10.7554/eLife.51963 (PMC7069727; doi:10.7554/eLife.51963)
Supplement: Figure 5—source data 3. [file elife-51963-fig5-data3.xlsx]

## Sheet: Sheet1
generations	lineage_1	lineage_1_1	lineage_1_1a	lineage_1_1b	lineage_1_1_1	lineage_1_1_1a	lineage_1_1_1b	lineage_1_2	lineage_1_2a	lineage_1_2b	lineage_1_2_1	lineage_1_2_1a	lineage_1_2_1b	lineage_1_2_1_1	lineage_1_2_1_1a	lineage_1_2_1_1b
50	0	0	0	0	0	0	0	0	0	0	0	0	0	0	0	0
100	0.11	0	0	0	0	0	0	0	0	0	0	0	0	0	0	0
150	0.34	0	0	0	0	0	0	0	0	0	0	0	0	0	0	0
200	0.26	0	0	0	0	0	0	0	0	0	0	0	0	0	0	0
250	0.28	0	0.05	0.05	0	0	0	0	0.15	0.15	0	0	0	0	0	0
300	0.67	0.220866	0.3	0.0791336	0	0	0	0.168055	0.55	0.381945	0	0	0	0	0	0
350	1	0.287871	0.31	0.0221292	0	0	0	0.577775	0.93	0.352225	0	0	0	0	0	0
400	1	0.216728	0.25	0.0332716	0	0	0	0.707913	0.98	0.272087	0	0	0	0	0	0
450	1	0.19075	0.19075	0	0	0	0	0.752029	0.97	0.217971	0	0	0	0	0	0
500	1	0.184694	0.184694	0	0	0	0	0.771661	0.97	0.198339	0	0.6	0.6	0	0	0
550	1	0.124616	0.124616	0	0	0	0	0.851926	1	0.148074	0.0324074	0.61	0.577593	0	0	0
600	1	0.119417	0.119417	0	0	0	0	0.885812	1	0.119417	0.128403	0.65	0.521597	0	0	0
650	1	0.0799631	0.0799631	0	0	0	0	0.915702	1	0.0799631	0.244935	0.7	0.455065	0	0	0
700	1	0.073445	0.073445	0	0	0	0	0.940336	1	0.073445	0.345208	0.68	0.334792	0	0.58	0.58
750	1	0.0751049	0.0751049	0	0	0	0	0.932663	1	0.0751049	0.290293	0.63	0.339707	0.01	0.54	0.53
800	1	0.0574301	0.0574301	0	0	0.04	0.04	0.938254	1	0.0574301	0.335319	0.64	0.304681	0	0.56	0.56
850	1	0.134035	0.134035	0	0.0739767	0.1	0.0260233	0.869594	1	0.134035	0.335319	0.7	0.364681	0.14	0.62	0.48
900	1	0.105842	0.105842	0	0.0739767	0.08	0.00602331	0.894117	1	0.105842	0.60436	0.85	0.24564	0	0.58	0.58
950	1	0.0710469	0.0710469	0	0.0739767	0.068	0	0.914934	1	0.0710469	0.731661	0.93	0.198339	0	0.65	0.65
1000	1	0.102879	0.102879	0	0.0739767	0.0739767	0	0.89187	1	0.102879	0.775257	0.97	0.194743	0.15	0.71	0.56
