# Supplementary material for: The evolutionary plasticity of chromosome metabolism allows adaptation to constitutive DNA replication stress
Source: eLife. 2020 Feb 11;9:e51963. doi: 10.7554/eLife.51963 (PMC7069727; doi:10.7554/eLife.51963)
Supplement: Supplementary file 4. [file elife-51963-supp4.xlsx]

## Sheet: Chromosome features
Chromosome feature	# observed in fork stall zones	# observed outside fork stall zones	# predicted in fork stall zones	# predicted outside fork stall zones	p-value (Chi-square test)
Long Terminal Repeats (LTRs)	229	152	130.086	250.914	1.1747e-26
Ty elements	45	4	16.7302	32.2698	1.64137e-17
tRNA genes	124	149	93.211	179.789	8.50466e-05
Rrm3 binding sites	21	94	39.2647	75.7353	0.000328406
G4 sequences	175	461	217.151	418.849	0.000423901
Repetitive sequences	68	209	94.5768	182.423	0.000758482
Fragile sites	55	141	66.9208	129.079	0.0725493
Highly transcribed genes	97	228	110.966	214.034	0.102329
ARS	106	246	120.184	231.816	0.11086
Centromeres	3	13	5.46292	10.5371	0.19412
Gamma-H2AX peaks	245	452	237.978	459.022	0.574881
Replication terminations	109	224	113.697	219.303	0.587263
snoRNA	25	52	26.2903	50.7097	0.756491
Weakly transcribed genes	113	212	110.966	214.034	0.81189
snRNA	2	4	2.04859	3.95141	0.966629
This table shows the observed number of elements within and outside of fork-stall zones in ctf4D ancestors (defined in matherials and methods) compared to the expected ones if they were distributed randomly. The two sets of data were compared using a Chi-square test, associated p-values are shown. Lines in bold have significant p-values after Bonferroni correction for multiple testing. Equal resu…
