# Supplementary material for: The evolutionary plasticity of chromosome metabolism allows adaptation to constitutive DNA replication stress
Source: eLife. 2020 Feb 11;9:e51963. doi: 10.7554/eLife.51963 (PMC7069727; doi:10.7554/eLife.51963)
Supplement: Supplementary file 5. [file elife-51963-supp5.xlsx]

## Sheet: Sheet1
Strain	Genotype	Note
yMF0100	MATa, RAD5+, ura3-1, ade2-1,trp1-1::BrdU-INC::TRP1 ,leu2-3,112::lacO::LEU2, his3-11,15::GFP-LacI::HIS3, hxt13D::ADE2, prACT-mCherry::hphMX4	wt ancestor MATa
yMF0108	MATa, RAD5+, ura3-1, ade2-1,trp1-1::BrdU-INC::TRP1 ,leu2-3,112::lacO::LEU2, his3-11,15::GFP-LacI::HIS3, hxt13D::ADE2, prACT-mCherry::hphMX4	wt ancestor MATa
yMF0117	MATa, RAD5+, ura3-1, ade2-1,trp1-1::BrdU-INC::TRP1 ,leu2-3,112::lacO::LEU2, his3-11,15::GFP-LacI::HIS3, hxt13D::ADE2, prACT-mCherry::hphMX4, ctf4D::Ble	ctf4D ancestor MATa
yMF0124	MATa, RAD5+, ura3-1, ade2-1,trp1-1::BrdU-INC::TRP1 ,leu2-3,112::lacO::LEU2, his3-11,15::GFP-LacI::HIS3, hxt13D::ADE2, prACT-mCherry::hphMX4, ctf4D::Ble	ctf4D ancestor MATa
yMF0237	MATa, RAD5+, ura3-1, ade2-1,trp1-1::BrdU-INC::TRP1 ,leu2-3,112::lacO::LEU2, his3-11,15::GFP-LacI::HIS3, hxt13D::ADE2, prACT-Cerulean::hphMX4	wt refernce strain MATa
yMF0239	MATa, RAD5+, ura3-1, ade2-1,trp1-1::BrdU-INC::TRP1 ,leu2-3,112::lacO::LEU2, his3-11,15::GFP-LacI::HIS3, hxt13D::ADE2, prACT-Cerulean::hphMX4	wt refernce strain MATa
yMF0241	MATa, RAD5+, ura3-1, ade2-1,trp1-1::BrdU-INC::TRP1 ,leu2-3,112::lacO::LEU2, his3-11,15::GFP-LacI::HIS3, hxt13D::ADE2, prACT-Cerulean::hphMX4 , ctf4D::Ble	ctf4D refernce strain MATa
yMF0243	MATa, RAD5+, ura3-1, ade2-1,trp1-1::BrdU-INC::TRP1 ,leu2-3,112::lacO::LEU2, his3-11,15::GFP-LacI::HIS3, hxt13D::ADE2, prACT-Cerulean::hphMX4, ctf4D::Ble	ctf4D refernce strain MATa
fMF0724	yMF117 evolved for 1000 generations	EVO1 (population)
fMF0725	yMF117 evolved for 1000 generations	EVO2 (population)
fMF0726	yMF117 evolved for 1000 generations	EVO3 (population)
fMF0727	yMF117 evolved for 1000 generations	EVO4 (population)
fMF0728	yMF124 evolved for 1000 generations	EVO5 (population)
fMF0729	yMF124 evolved for 1000 generations	EVO6 (population)
fMF0730	yMF124 evolved for 1000 generations	EVO7 (population)
fMF0731	yMF124 evolved for 1000 generations	EVO8 (population)
fMF0875	yMF100 evolved for 1000 generations	EVO9 (population)
fMF0876	yMF100 evolved for 1000 generations	EVO10 (population)
fMF0877	yMF100 evolved for 1000 generations	EVO11 (population)
fMF0878	yMF100 evolved for 1000 generations	EVO12 (population)
fMF0879	yMF108 evolved for 1000 generations	EVO13 (population)
fMF0880	yMF108 evolved for 1000 generations	EVO14 (population)
fMF0881	yMF108 evolved for 1000 generations	EVO15 (population)
fMF0882	yMF108 evolved for 1000 generations	EVO16 (population)
fMF0939	yMF117 evolved for 1000 generations	EVO1-3 (clone)
fMF0940	yMF117 evolved for 1000 generations	EVO1-7 (clone)
fMF0941	yMF117 evolved for 1000 generations	EVO1-9 (clone)
fMF0942	yMF117 evolved for 1000 generations	EVO1-12 (clone)
fMF0943	yMF117 evolved for 1000 generations	EVO2-1 (clone)
fMF0944	yMF117 evolved for 1000 generations	EVO2-2 (clone)
fMF0945	yMF117 evolved for 1000 generations	EVO2-3 (clone)
fMF0946	yMF117 evolved for 1000 generations	EVO2-10 (clone)
fMF0947	yMF117 evolved for 1000 generations	EVO3-1 (clone)
fMF0948	yMF117 evolved for 1000 generations	EVO3-8 (clone)
fMF0949	yMF117 evolved for 1000 generations	EVO3-9 (clone)
fMF0950	yMF117 evolved for 1000 generations	EVO3-12 (clone)
fMF0951	yMF117 evolved for 1000 generations	EVO4-2 (clone)
fMF0952	yMF117 evolved for 1000 generations	EVO4-3 (clone)
fMF0953	yMF117 evolved for 1000 generations	EVO4-5 (clone)
fMF0954	yMF117 evolved for 1000 generations	EVO4-9 (clone)
fMF0955	yMF124 evolved for 1000 generations	EVO5-3 (clone)
fMF0956	yMF124 evolved for 1000 generations	EVO5-4 (clone)
fMF0957	yMF124 evolved for 1000 generations	EVO5-5 (clone)
fMF0958	yMF124 evolved for 1000 generations	EVO5-11 (clone)
fMF0959	yMF124 evolved for 1000 generations	EVO6-1 (clone)
fMF0960	yMF124 evolved for 1000 generations	EVO6-3 (clone)
fMF0961	yMF124 evolved for 1000 generations	EVO6-5 (clone)
fMF0962	yMF124 evolved for 1000 generations	EVO6-7 (clone)
fMF0963	yMF124 evolved for 1000 generations	EVO7-4 (clone)
fMF0964	yMF124 evolved for 1000 generations	EVO7-6 (clone)
fMF0965	yMF124 evolved for 1000 generations	EVO7-7 (clone)
fMF0966	yMF124 evolved for 1000 generations	EVO7-9 (clone)
fMF0967	yMF124 evolved for 1000 generations	EVO8-5 (clone)
fMF0968	yMF124 evolved for 1000 generations	EVO8-7 (clone)
fMF0969	yMF124 evolved for 1000 generations	EVO8-9 (clone)
fMF0970	yMF124 evolved for 1000 generations	EVO8-10 (clone)
yMF0732	MATa, leu2-3,112 trp1-1 can1-100 ura3-1 ade2-1 his3-11,15, RAD5+, ura3::NatMX4-pSTE2-URA3	For bulk segregant analysis
yMF0733	MATa, leu2-3,112 trp1-1 can1-100 ura3-1 ade2-1 his3-11,15, RAD5+, ura3::NatMX4-pSTE2-URA3	For bulk segregant analysis
yMF0344	yMF117, rad9D::KanMX4
yMF0691	yMF117, rad9-N883*
yMF0071	yMF124, mad2D::NatNT2
yMF0451	yMF117, pds1-m9	Original pds1-m9 strain obtained from S.Elledge
yMF0407	yMF117, dbf4-4A::HIS3, sld3-38A-10his13myc::KanMX	Original dbf4-4A, sld3-38A strain obtained from P.Zegerman
yMF0428	yMF117, pRS406-URA3
yMF0434	yMF117, pRS406-URA3-PSCC4-SCC4
yMF0433	yMF117, pRS406-URA3-PSCC2-SCC2
yMF0693	yMF117, pRS406-URA3-PSCC2-SCC2, pRS404-TRP1-PSCC4-SCC4
yMF0441	yMF117, sld5-E130K
yMF0316	yMF117, ixr1D::KanMX4
yMF0692	yMF117, ixr1-Q332*
yMF0461	yMF100, sld5-E130K
yMF0558	yMF100, pGAL-SML1::KanMX4
yMF0721	yMF100, rad9D::NatNT2, sld5-E130K
yMF0722	yMF100, ixr1D::KanMX4, sld5-E130K
yMF0723	yMF117, pRS406-URA3-PSCC2-SCC2, sld5-E130K
yMF0724	yMF117, pRS406-URA3-PSCC2-SCC2, ixr1D::KanMX4
yMF0725	yMF117, pRS406-URA3-PSCC2-SCC2, rad9D::NatNT2
yMF0726	yMF100, rad9D::NatNT2, ixr1D::KanMX4
yMF0727	yMF117, pRS406-URA3-PSCC2-SCC2, sld5-E130K, rad9D::NatNT2
yMF0728	yMF117, pRS406-URA3-PSCC2-SCC2, ixr1D::KanMX4, rad9D::NatNT2
yMF0729	yMF100, rad9D::NatNT2, ixr1D::KanMX4, sld5-E130K
yMF0730	yMF100, pRS406-URA3-PSCC2-SCC2, ixr1D::KanMX4, sld5-E130K
yMF0731	yMF100, pRS406-URA3-PSCC2-SCC2, rad9D::NatNT2, ixr1D::KanMX4
